# Supplementary material for: Complex Evolutionary History of the South American Fox Genus Lycalopex (Mammalia, Carnivora, Canidae) Inferred from Multiple Mitochondrial and Nuclear Markers
Source: MDPI journal article supplement (doi:10.3390/d14080642), 2022-08-11
Supplement: s1 [file s1]

Supplementary Material – Favarini et al.

Table S1: Samples of *Lycalopex* individuals analyzed in this study.

| Species                      | Geographic Origin                              | Sample Identification Number                                                                                | Institution / Contact                                 |
|------------------------------|------------------------------------------------|-------------------------------------------------------------------------------------------------------------|-------------------------------------------------------|
| <i>Lycalopex sechurae</i>    | Peru                                           | bPse-01 <sup>a</sup> , bPse02 <sup>a</sup> , bPse03 <sup>a</sup> , bPse04 <sup>a</sup>                      | F. Angulo, S. Cárdenas-Alayza                         |
| <i>Lycalopex culpaeus</i>    | Central – Argentina                            | bPcu01 <sup>a</sup> , bPcu02 <sup>a</sup>                                                                   | C. B. Kasper, M. F. Rodrigues                         |
|                              | Marcona – Peru                                 | bPcu03 <sup>a</sup> , bPcu04 <sup>a</sup> , bPcu05 <sup>a</sup> , bPcu06 <sup>a</sup>                       | M. Roca, M. Cardeña, S. Cárdenas-Alayza               |
|                              | Parque Nacional Nahuelbuta - Chile             | bPcu07 <sup>a</sup>                                                                                         | W. Johnson                                            |
| <i>Lycalopex griseus</i>     | Western Argentina                              | bPgr01 <sup>a</sup> , bPgr02 <sup>a</sup>                                                                   | C. B. Kasper, M. F. Rodrigues                         |
|                              | Parque Nacional Nahuelbuta - Chile             | bPgr03 <sup>a</sup> , bPgr04 <sup>a</sup> , bPgr05 <sup>a</sup> , bPgr06 <sup>a</sup>                       | W. Johnson                                            |
|                              | Central-Eastern Argentina                      | bPgr07 <sup>a</sup> , bPgr08 <sup>a</sup>                                                                   | C. B. Kasper, M. F. Rodrigues                         |
| <i>Lycalopex gymnocercus</i> | Porto Alegre - Rio Grande do Sul (RS) - Brazil | bPgy50 <sup>a</sup>                                                                                         | J. Koeneman                                           |
|                              | Camaquã (RS) – Brazil                          | bPgy52 <sup>a</sup>                                                                                         | C. B. Kasper, M. F. Rodrigues                         |
|                              | Capão do Leão (RS) - Brazil                    | bPgy53 <sup>a</sup>                                                                                         | C. B. Kasper, M. F. Rodrigues                         |
|                              | Bom Jesus (RS) - Brazil                        | bPgy55 <sup>a</sup> , bPgy58 <sup>a</sup> , bPgy73 <sup>a</sup> , bPgy77 <sup>a</sup> , bPgy80 <sup>a</sup> | C. B. Kasper                                          |
|                              | Santa Catarina (SC) - Brazil                   | bPgy61 <sup>a</sup> , bPgy72 <sup>a</sup>                                                                   | C. B. Kasper, M. Piccoli / Fundação Zoobotânica do RS |
|                              | Rio Grande (RS) - Brazil                       | bPgy62 <sup>a</sup>                                                                                         | C. B. Kasper                                          |
|                              | Arroio Grande (RS) - Brazil                    | bPgy63 <sup>a</sup> , bPgy66 <sup>a</sup>                                                                   | C. B. Kasper                                          |
|                              | Jaguarão-Pelotas (RS) – Brazil                 | bPgy64 <sup>a</sup>                                                                                         | C. B. Kasper, M. F. Rodrigues                         |

|                           |                                    |                                                                                                                                    |                               |
|---------------------------|------------------------------------|------------------------------------------------------------------------------------------------------------------------------------|-------------------------------|
|                           | Paraná – Brazil                    | bPgy67 <sup>a</sup>                                                                                                                | M. H. N. Capão da Imbuia      |
|                           | Alegrete (RS) – Brazil             | bPgy83 <sup>a</sup>                                                                                                                | C. B. Kasper, M. F. Rodrigues |
|                           | Eastern Argentina                  | bPgy84 <sup>a</sup>                                                                                                                | C. B. Kasper, M. F. Rodrigues |
| <i>Lycalopex vetulus</i>  | Goias (Go) - Brazil                | bPve10 <sup>a</sup>                                                                                                                | F. Grazziotin, A. Garda       |
|                           | Maranhão (MA) - Brazil             | bPve13 <sup>a</sup> , bPve14 <sup>a</sup> , bPve15 <sup>a</sup>                                                                    | C. B. Kasper                  |
|                           | Piaui (PI) – Brazil                | bPve16 <sup>a</sup>                                                                                                                | C. B. Kasper                  |
|                           | Mato Grosso (MT) - Brazil          | bPve307 <sup>a</sup> , bPve309 <sup>a</sup> , bPve310 <sup>a</sup>                                                                 | CENAP/ICMBio                  |
|                           | Brazil                             | bPve18 <sup>a</sup>                                                                                                                | CENAP/ICMBio                  |
|                           | São Paulo (SP) - Brazil            | bPve322 <sup>a</sup> , bPve227 <sup>a</sup> , bPve328 <sup>a</sup> , bPve353 <sup>a</sup>                                          | CENAP/ICMBio                  |
| <i>Lycalopex fulvipes</i> | Parque Nacional Nahuelbuta - Chile | bPfu01 <sup>a</sup> , bPfu02 <sup>a</sup> , bPfu03 <sup>a</sup> , bPfu04 <sup>a</sup> , bPfu05 <sup>a</sup> , bPfu006 <sup>a</sup> | W. Johnson                    |

Table S2: Mitochondrial DNA segments amplified and sequenced from the genus *Lycalopex* in this study.

| Segment                                    | PCR/sequencing<br>Primers | Reference                 |
|--------------------------------------------|---------------------------|---------------------------|
| <i>Cytocrome oxidase c subunit I (COI)</i> | LCO1490 / HCO2198         | Folmer et al (1994)       |
| Control region (D-Loop)                    | MTLPRO2 / CCR-DR1         | Tchaicka et al. (2007)    |
| <i>Cytochrome b (cyt-b)</i>                | Cytb-DF1 / Cytb-DR1       | This study                |
|                                            | L14724/ H15494            | Irwin et al. (1991)       |
|                                            | L15162/ H15915            |                           |
| ND5                                        | ND5-DF1 / ND5-DR1         | Trigo et al. (2008)       |
| 7mt                                        | mtDNA7H / mtDNA7L         | Delisle & Strobeck (2002) |
| 8mt                                        | mtDNA8H / mtDNA8L         | Delisle & Strobeck (2002) |

Table S3. Mitochondrial PCR/sequencing primers generated from the genus *Lycalopex* in this study.

| Segment     | Primer   | Primer (5' – 3')            |
|-------------|----------|-----------------------------|
| <i>Cytb</i> | Cytb-DF1 | TCTCACATGGAATTTAACCATGA     |
|             | Cytb-DR1 | GAATTTTCAGCTTTGGGTGCT       |
| 7mt         | 7mti-R1  | CAAGTAATAGATACTCCGGAGGCTAG  |
|             | 7mti-F2  | ACCATACCCCTATCGTACAAAAAG    |
|             | 7mti-R2  | CATGGGGTCAAAACCATATT        |
|             | 7mti-F3  | CCGCTGCATGATATTGACA         |
| 8mt         | 8mti-R1  | CTACTAGGAGTGGGAGGGATCCT     |
|             | 8mti-F2  | ACCACTATTAGCACTTACAACATGACT |
|             | 8mti-R2  | AGTACGGCTATGGATTCGTTC       |
|             | 8mti-F3  | GTAGCGGTTCTTATTCAAACACC     |
| 9mt         | 9mti-F2  | GCAAATACAGCTGCCCTACAAGC     |

Table S4: *Lycalopex* mitochondrial DNA data set features. N: Number of sequenced individuals; L: Length of the sequenced segment; V: variable sites; PI: parsimony-informative sites; EM: evolutionary model estimated for each partition.

| Partition | N  | L (bp) | Full data set |     | Ingroup only |     | EM      |
|-----------|----|--------|---------------|-----|--------------|-----|---------|
|           |    |        | V             | PI  | V            | PI  |         |
| COI&III   | 59 | 715*   | 180           | 154 | 53           | 44  | HKY+G   |
| ND3       | 38 | 347    | 104           | 77  | 29           | 24  | HKY+G   |
| ND4L      | 60 | 297    | 82            | 71  | 27           | 21  | HKY+I   |
| ND4       | 65 | 1372   | 417           | 360 | 165          | 124 | HKY+I+G |
| ND5       | 66 | 1197   | 369           | 319 | 146          | 112 | GTR+G   |
| Cytb      | 64 | 1139   | 316           | 255 | 135          | 96  | GTR+I   |
| CR        | 63 | 596**  | 153           | 129 | 103          | 87  | HKY+I+G |
| tRNAs     | 63 | 337    | 50            | 34  | 17           | 12  | HKY+I+G |

|              |    |      |      |      |     |     |         |
|--------------|----|------|------|------|-----|-----|---------|
| Concatenated | 56 | 6000 | 1671 | 1399 | 675 | 520 | GTR+I+G |
|--------------|----|------|------|------|-----|-----|---------|

\**COI* spanned 676 bp and *COIII* spanned 39 bp.

\*\*After exclusion of 40 bp presenting ambiguous alignment.

Table S5: Estimation of the times of origin (time to the most recent common ancestor – TMRCA) for genus *Lycalopex*, as well as each of the analyzed species, with the mtDNA data set.

|         | TMRCA            |                   |                    |                       |                   |                    |                    |
|---------|------------------|-------------------|--------------------|-----------------------|-------------------|--------------------|--------------------|
|         | <i>Lycalopex</i> | <i>L. vetulus</i> | <i>L. sechurae</i> | <i>L. gymnocercus</i> | <i>L. griseus</i> | <i>L. culpaeus</i> | <i>L. fulvipes</i> |
| Mean    | 1.17             | 0.17              | 0.09               | 0.39                  | 0.21              | 0.35               | 0.06               |
| 95% HPD |                  |                   |                    |                       |                   |                    |                    |
| lower   | 0.88             | 0.12              | 0.05               | 0.29                  | 0.14              | 0.25               | 0.03               |
| 95% HPD |                  |                   |                    |                       |                   |                    |                    |
| upper   | 1.52             | 0.23              | 0.13               | 0.51                  | 0.29              | 0.47               | 0.10               |

Table S6: Number of sequences generated here per species of *Lycalopex* for each nuclear gene segment.

| Species                      | Gene           |               |               |            |            |             |            |
|------------------------------|----------------|---------------|---------------|------------|------------|-------------|------------|
|                              | <i>ATP7AE3</i> | <i>CHRNA1</i> | <i>CYP1A1</i> | <i>FES</i> | <i>GHR</i> | <i>TCP1</i> | <i>VTN</i> |
| <i>Lycalopex culpaeus</i>    | 3              | 8             | 6             | 2          | 1          | 6           | 4          |
| <i>Lycalopex fulvipes</i>    | 5              | 7             | 6             | 3          | 2          | 8           | 4          |
| <i>Lycalopex griseus</i>     | 4              | 9             | 9             | 4          | 2          | 9           | 5          |
| <i>Lycalopex gymnocercus</i> | 3              | 7             | 7             | 2          | 4          | 6           | 6          |
| <i>Lycalopex sechurae</i>    | 2              | 4             | 5             | 1          | 2          | 3           | 4          |
| <i>Lycalopex vetulus</i>     | 5              | 4             | 5             | 3          | 4          | 4           | 8          |
| <i>Cerdocyon thous</i>       | 0              | 4             | 2             | 4          | 2          | 3           | 2          |
| <b>Total</b>                 | <b>22</b>      | <b>43</b>     | <b>40</b>     | <b>19</b>  | <b>17</b>  | <b>39</b>   | <b>33</b>  |

Table S7: Accession numbers for nuclear sequences downloaded from GenBank for genus *Lycalopex*.

| Species                      | <i>CHRNA1</i>                | <i>CYP1A1</i> | <i>FES</i> | <i>GHR</i> | <i>VTN</i> |
|------------------------------|------------------------------|---------------|------------|------------|------------|
| <i>Lycalopex culpaeus</i>    | DQ239440.1                   | DQ239448.1    | DQ239456.1 | DQ239464.1 | DQ239480.1 |
| <i>Lycalopex fulvipes</i>    | DQ239441.1                   | DQ239449.1    | DQ239457.1 | DQ239465.1 | DQ239481.1 |
| <i>Lycalopex griseus</i>     | AY885319.1                   | AY885343.1    | AY885366.1 | AY885390.1 | AY885414.1 |
| <i>Lycalopex gymnocercus</i> | EF106987.1 and<br>AY885320.1 | AY885344.1    | AY885367.1 | AY885391.1 | AY885415.1 |

|                           |                              |            |                                                            |            |            |
|---------------------------|------------------------------|------------|------------------------------------------------------------|------------|------------|
| <i>Lycalopex sechurae</i> | AY885321.1                   | AY885345.1 | AY885368.1                                                 | AY885392.1 | AY885416.1 |
| <i>Lycalopex vetulus</i>  | DQ239442.1 and<br>EF106988.1 | DQ239450.1 | DQ239458.1                                                 | DQ239466.1 | DQ239482.1 |
| <i>Cerdocyon thous</i>    |                              |            | AY885364.1;<br>EF107038.1;<br>EF107041.1 and<br>EF106982.1 | AY885388.1 | -          |
|                           |                              | AY885341.1 | EF107040.1                                                 |            |            |

Table S8: List of the nuclear segments and primers used in this study for genus *Lycalopex*.

| Gene                  | Gene Name                                                                       | Reference                                                                           |
|-----------------------|---------------------------------------------------------------------------------|-------------------------------------------------------------------------------------|
| <b>ATP7A - exon 3</b> | <i>ATPase, Cu++ transporting, alpha polypeptide</i> , exon 3                    | This study.<br>F: 5'aaaaatgcaactattatttatgacccta3'<br>R: 5' taattcgctgaacaccttgc 3' |
| <b>CHRNA1</b>         | <i>Cholinergic receptor, nicotinic alpha polypeptide precursor 1</i> , intron 8 | Lyons et al. (1997)                                                                 |
| <b>CYP1A1</b>         | <i>Cytochrome P-450</i> , intron 3 to exon 6                                    | Venta et al. (1996)                                                                 |
| <b>FES</b>            | <i>Feline sarcoma protooncogene</i> , intron 14                                 | Venta et al. (1996)                                                                 |
| <b>GHR</b>            | <i>Growth hormone receptor</i> , intron 9 to exon 10                            | Venta et al. (1996)                                                                 |
| <b>TCP1</b>           | <i>T-complex protein 1, alpha subunit</i>                                       | Lyons et al. (1997)                                                                 |
| <b>VTN</b>            | <i>Vitronectin</i> , intron 4                                                   | Jiang et al. (1998)                                                                 |

Table S9: Parameters employed for the \*BEAST analyses.

| Parameter                           | Setting                                                          |
|-------------------------------------|------------------------------------------------------------------|
| <b>Chain length*</b>                | 200.000.000                                                      |
| <b>Spacing between data samples</b> | 20.000                                                           |
| <b>Species tree prior</b>           | Species tree: Yule process                                       |
| <b>Population Size Model</b>        | Piecewise linear & constant root                                 |
| <b>Clock Model</b>                  | Strict Clock                                                     |
| <b>Base frequencies</b>             | Empirical                                                        |
| <b>Substitution Model</b>           | HKY for <i>ATP7AE3</i> , <i>GHR</i> , <i>TCP1</i> and <i>VTN</i> |
|                                     | HKY+I for <i>CHRNA1</i> , <i>CYP1A1</i> and <i>FES</i>           |

\* The initial 10% of each MCMC run was discarded as burn-in.

### References for the Supplementary Material

Jiang, Z. Priat, C. Galibert, F. 1988 Traced orthologous amplified sequence tags (TOASTs) and mammalian comparative maps. *Mamm. Genome* **9**, 577–587. (doi: 10.1007/s003359900821)

Lyons, L. A. Laughlin, T. F. Copeland, N. G., Jenkins, N. A., Womack, J. E., O'Brien, S. J. 1997 Comparative anchor tagged sequences (CATS) for Integrative mapping of mammalian genomes. *Nature Genetics* **15** 47–56. (doi:10.1038/ng0197-47)

Venta, P. J. Brouillette, J. A. Yuzbasiyan-Gurkan, V. Brewer, G. J. 1996 Gene-specific universal mammalian sequence-tagged sites: application to the canine genome. *Biochem. Genet.* **34**,321–341. (doi: 10.1007/BF02399951).

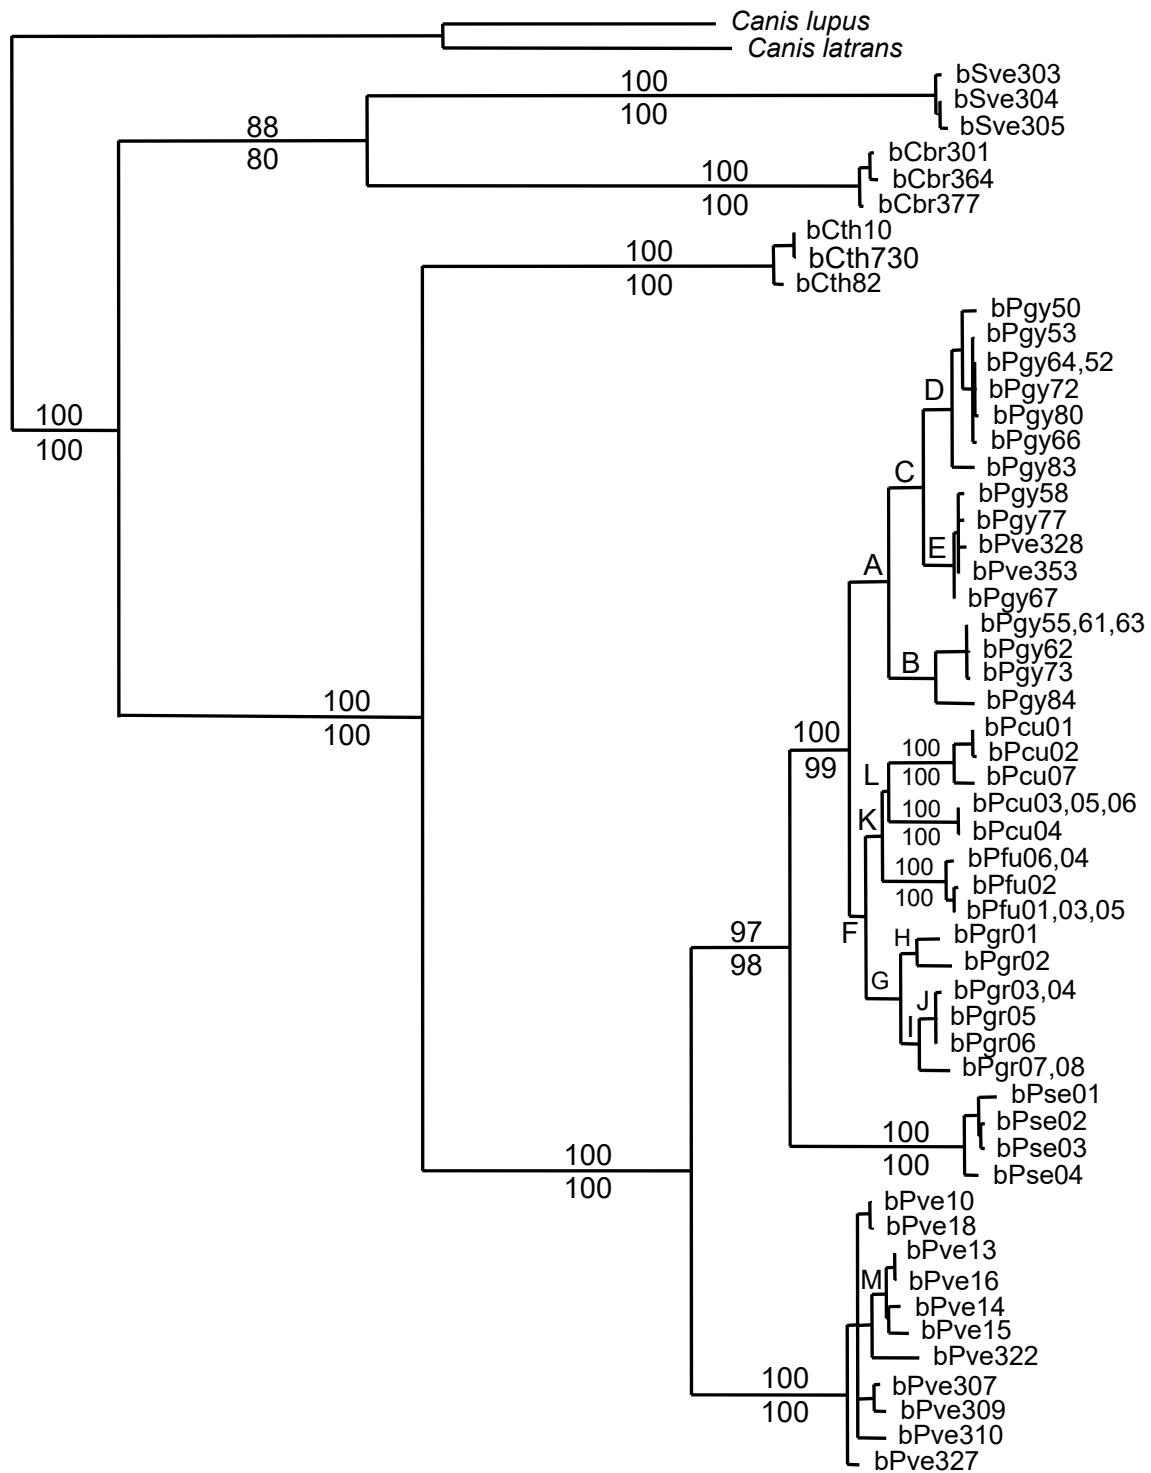

Figure S1. Maximum parsimony phylogeny of genus *Lycalopex*. Strict consensus of 270 equally parsimonious trees (length: 2889) retrieved with PAUP\*. Values above and below branches represent bootstrap support computed with PAUP and TNT, respectively. Support values for lettered nodes are given in Table 5. See Figure 2 and Table 1 for sample identification codes.

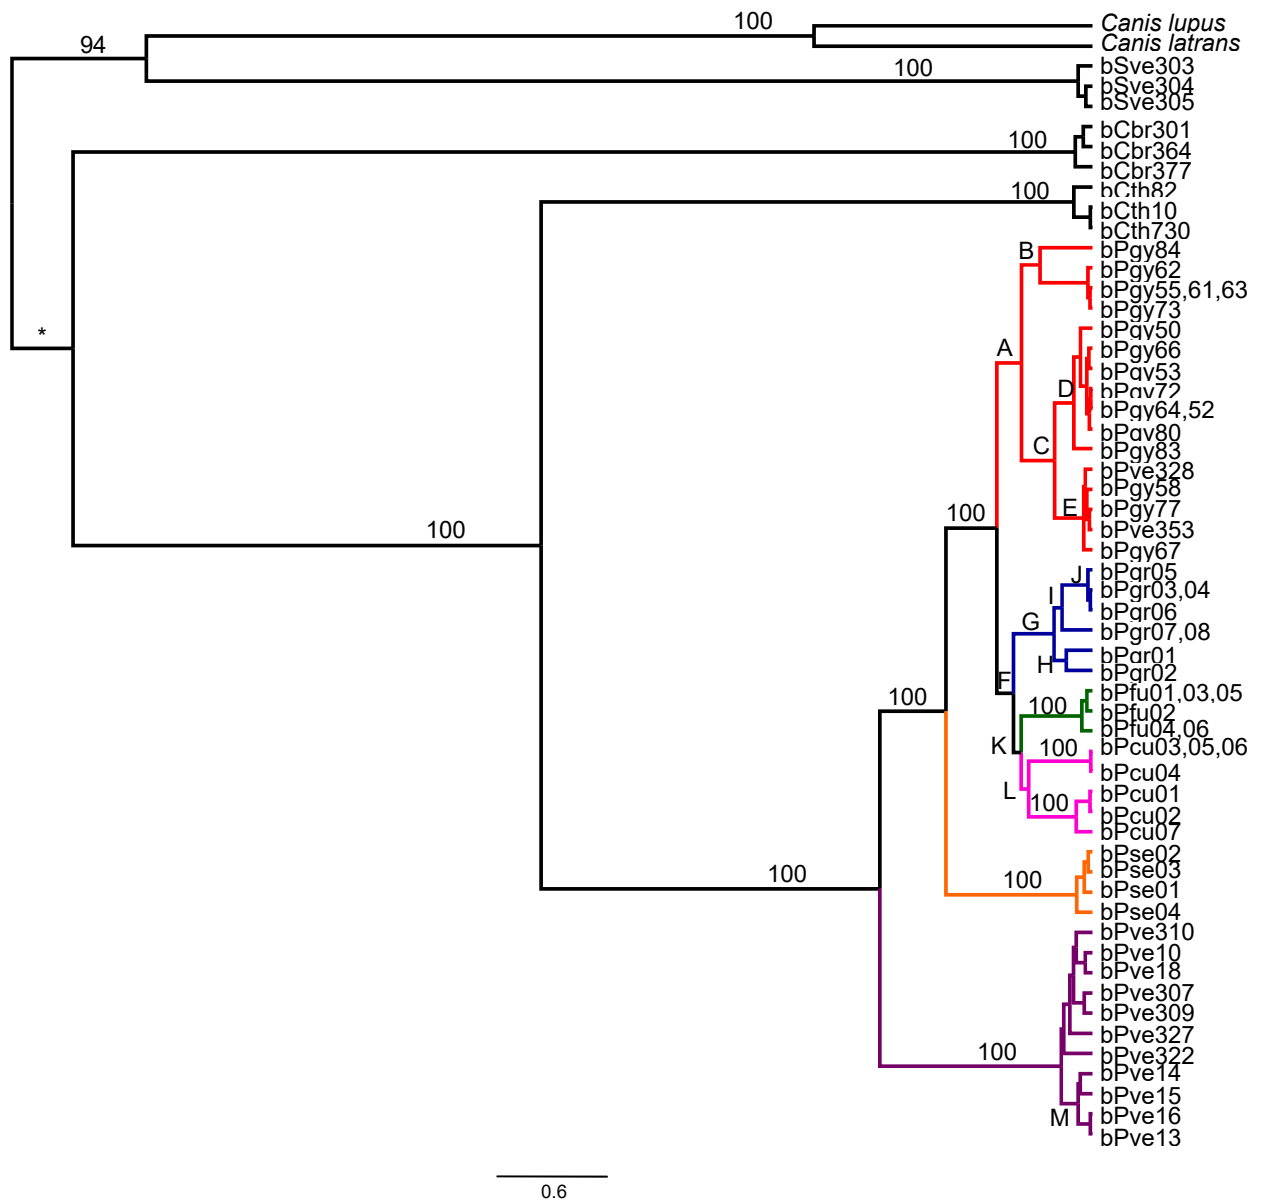

Figure S2. Bayesian phylogeny of South American foxes of genus *Lycalopex*, generated with Beast 1.6.0. Values above branches indicate the Bayesian posterior probability (expressed as percentages) of the clade defined by the adjacent node. The asterisk indicates a posterior probability below 0.50. Support values for lettered nodes are given in Table 5. Species-level branches are colored as in Figure 2.
